# Supplementary material
Source: PubMed Central journal article supplement (PMC6196098)
Supplement: NIHMS1502878-supplement-1.pdf [file NIHMS1502878-supplement-1.pdf]

### Online Figure 1. Exit Interview

What parts of the rehab program did you use?  
(Check all that apply)

- Phone calls with Rehab Coordinator
- Smartphone App
- Jawbone (fitness wristband)
- AliveCor (EKG monitor)

How satisfied were you with each of the following?

The smart phone rehab program

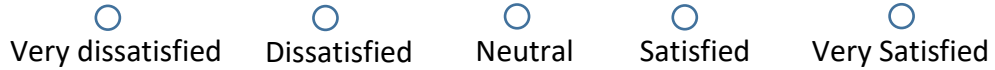

The phone calls with your rehab coach

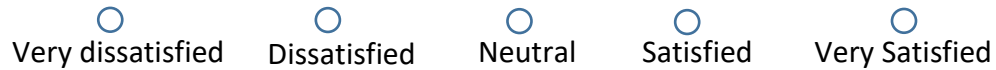

The program overall

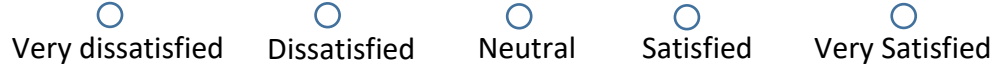

How confident are you that you can:

If using pen and paper please write any number from 0-100  
0 being Not very confident      50 being Neutral      100 being Very confident

Exercise without making symptoms worse?

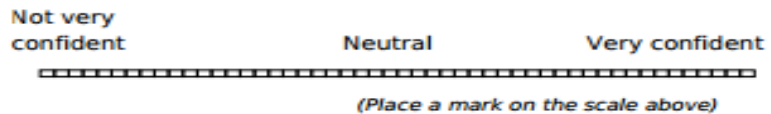

Track your blood pressure?

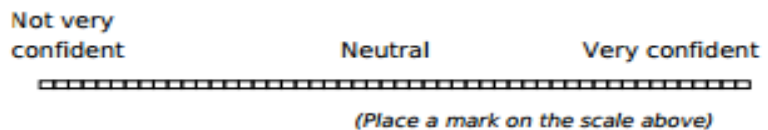

Monitor your heart rate?



Follow my health action plans discussed with my coach?

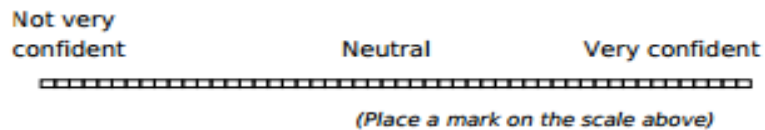

Ask your coach/doctor things about your illness that concerns you?

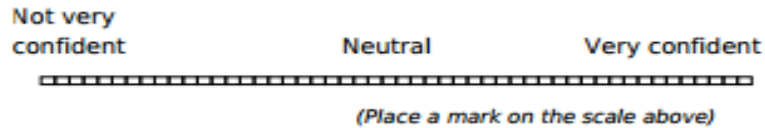

How much do you think the smart phone rehab program helped you?

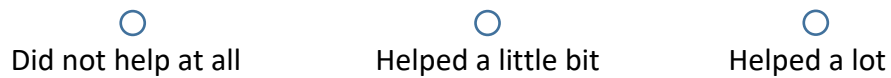

Were you invited to participate in traditional or other cardiac rehabilitation programs (i.e., other than this smartphone program)?

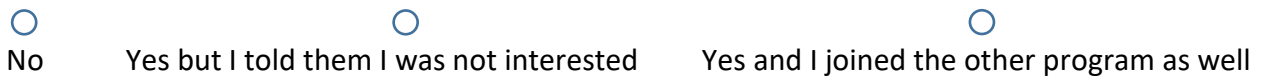

If you declined traditional cardiac rehabilitation, why did you choose not to participate?  
(Check all that apply)

- I was content with my current program using the smart phone
- I was told about a co-pay and did not want to pay
- It was too far
- I did not have time during the workday
- N/A

Notes for discussion of traditional vs. smartphone rehab program:

---

The next section asks you questions about the smart phone application.

Please read the following statements and rate your level of agreement:

Strongly agree, Agree, Neutral, Disagree or Strongly disagree

The smart phone application reminded me to check my blood pressure and heart rate

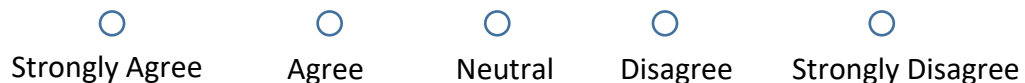

The smart phone application helped me remember to take my medications

Strongly Agree     Agree     Neutral     Disagree     Strongly Disagree

The smart phone application was easy to use

Strongly Agree     Agree     Neutral     Disagree     Strongly Disagree

The program helped improve my physical abilities, such as taking care of myself

Strongly Agree     Agree     Neutral     Disagree     Strongly Disagree

The program helped improve my confidence in my ability to exercise

Strongly Agree     Agree     Neutral     Disagree     Strongly Disagree

I felt comfortable with the app in general

Strongly Agree     Agree     Neutral     Disagree     Strongly Disagree

I found the chat feature helpful in the app

Strongly Agree     Agree     Neutral     Disagree     Strongly Disagree

Is there any topic that the videos did NOT teach you, that you would have liked to learn?

---

Did you learn anything about your health that you did not know before from the video lessons?

- No, I did not learn anything new.
- Yes, I learned something new
- I did not watch the videos

Did you need to call or reach out for technical support during the study?

- Yes
- No

If YES, what technical support did you need?

---

What did you find you liked about the phone application?

---

What did you NOT like about the mobile application?

---

The next section will ask you about your coach.

---

Did you call your coach?

  

Yes  
No

The phone calls from my coach were helpful.

Strongly Agree     Agree     Neutral     Disagree     Strongly Disagree     N/A or decline

What, if any, are the most important things that you learned from your coach directly?

---

Overall, what suggestions do you have to improve the program?

---
