# Supplementary material
Source: PubMed Central journal article supplement (PMC6196098)

## Online Figure 2. Study Enrollment Chart

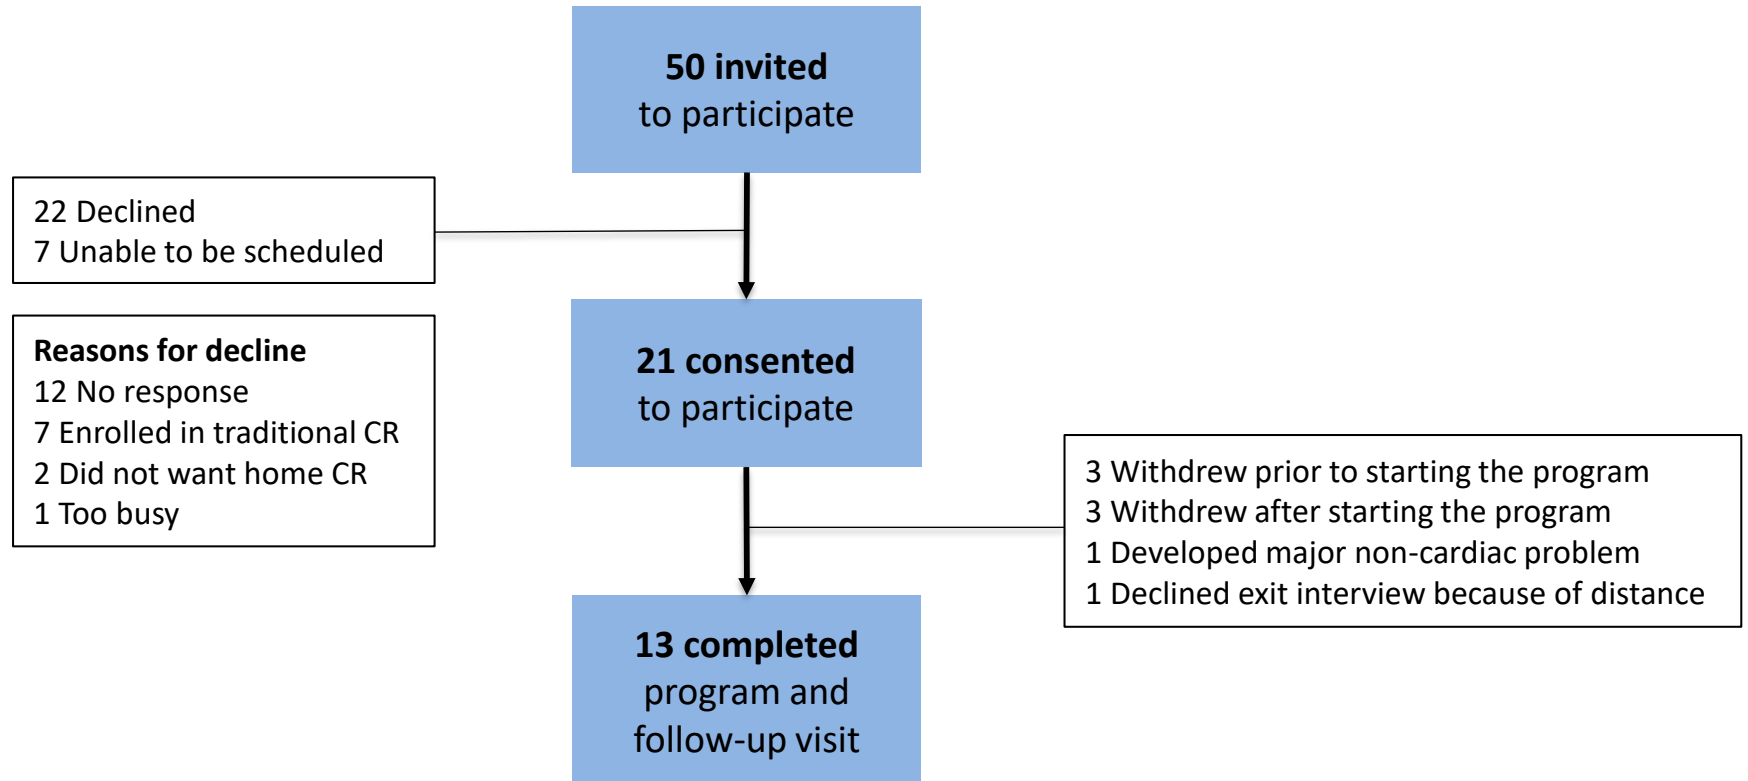

Supplement: NIHMS1502878-supplement-2.pdf [file NIHMS1502878-supplement-2.pdf]
